# Supplementary material for: Rapid detection and quantitative analysis of thiram in fruits using a shape-adaptable flexible SERS substrate combined with deep learning
Source: Royal Society of Chemistry journal article supplement (doi:10.1039/d4ay02098g), 2025-01-01
Supplement: d4ay02098g1.pdf [file d4ay02098g1.pdf]

# Rapid detection and quantitative analysis of thiram in fruits using shape-adaptable flexible SERS substrate combined with deep learning

Hongjun Wang, Ziyang Bian, Yue Wang, Huijuan Niu, Zhenshan Yang, Hefu Li\*

*School of Physical Science and Information Engineering, Liaocheng University,*

*Liaocheng 252000, China*

Corresponding author: lihefu@lcu.edu.cn

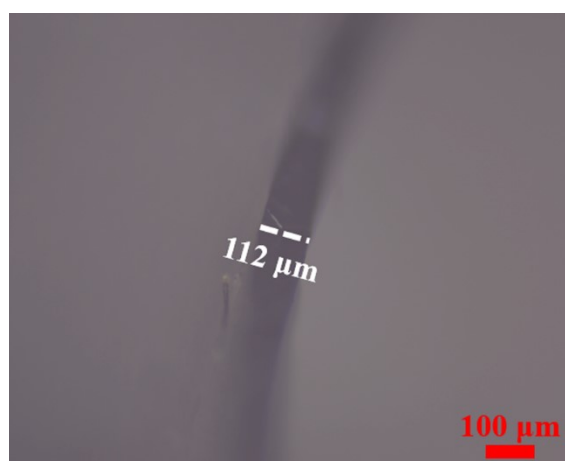

**Fig. S1** The optical microscopy image of the cross-section of PDMS film.

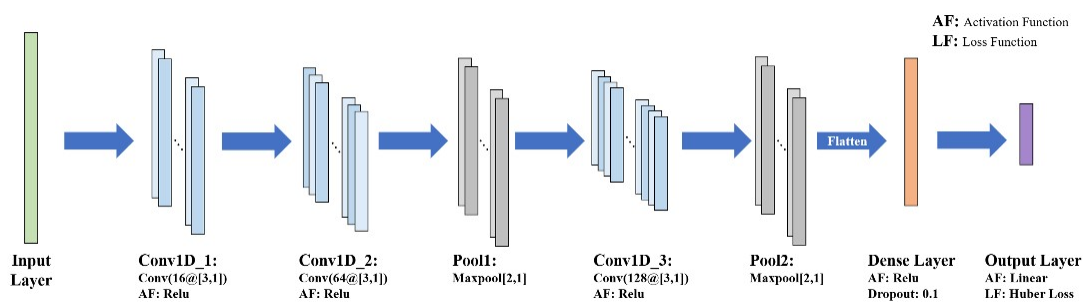

**Fig. S2** The structure diagram of 1D CNN model.

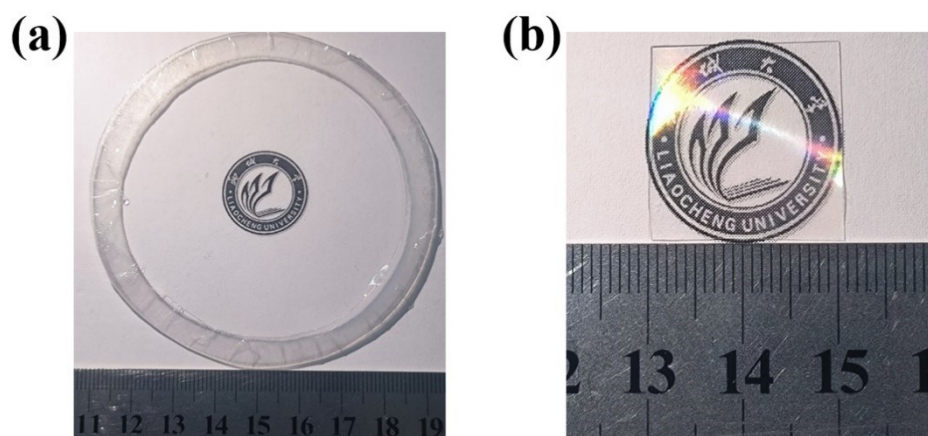

**Fig. S3** (a) Photo of a flat PDMS film obtained by the floating-on-water method, (b) photo of a wrinkled PDMS film prepared by oxygen plasma treatment.

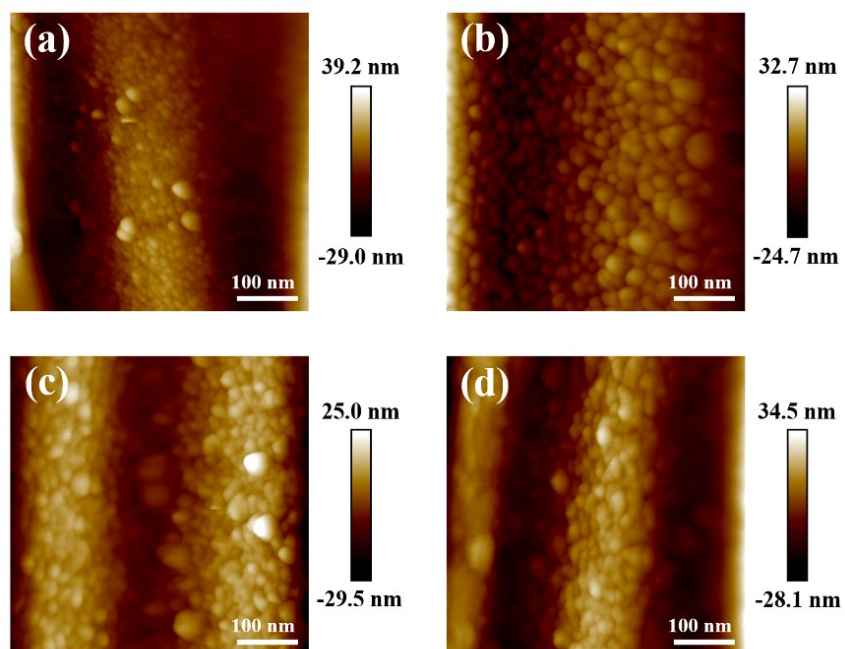

**Fig. S4** AFM images of Ag NPs on corrugated PDMS films prepared using different deposition times: (a) 5 s, (b) 10 s, (c) 15 s, and (d) 20 s.

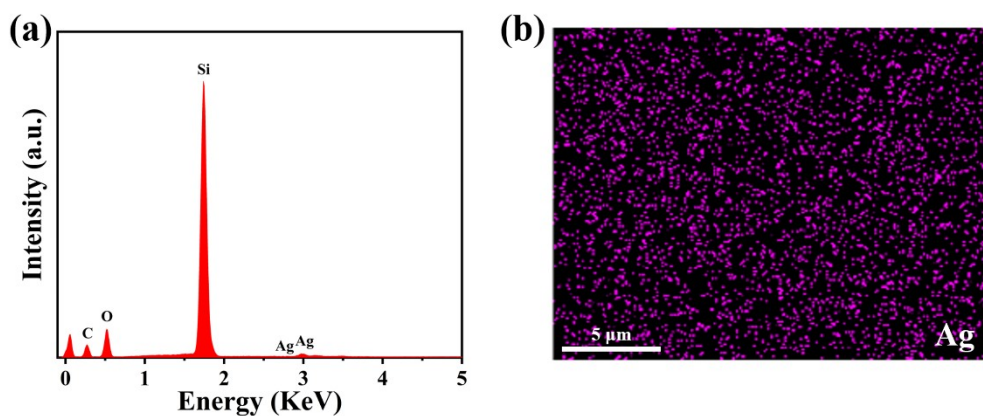

**Fig. S5** (a) The EDS spectra of corrugated Ag NPs@PDMS film prepared with a deposition time of 15 s, and (b) the corresponding EDS mapping of the Ag NPs.

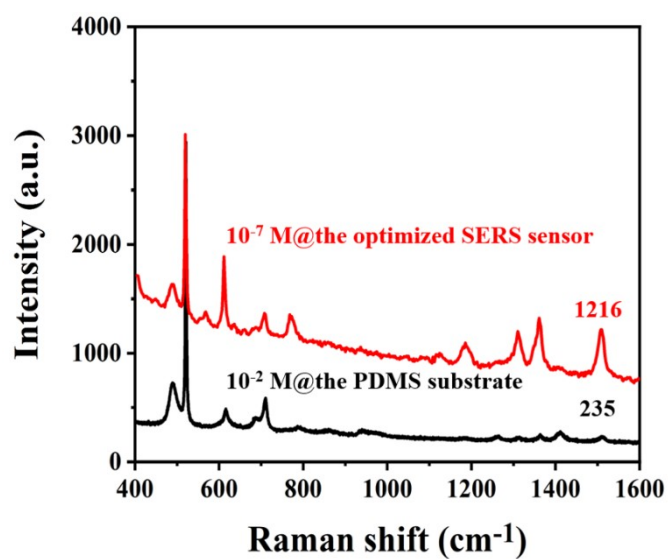

**Fig. S6** Comparison of SERS spectra and normal Raman of R6G on the corrugated Ag NPs@PDMS SERS substrate ( $10^{-7}$  M) and flat PDMS film ( $10^{-2}$  M).

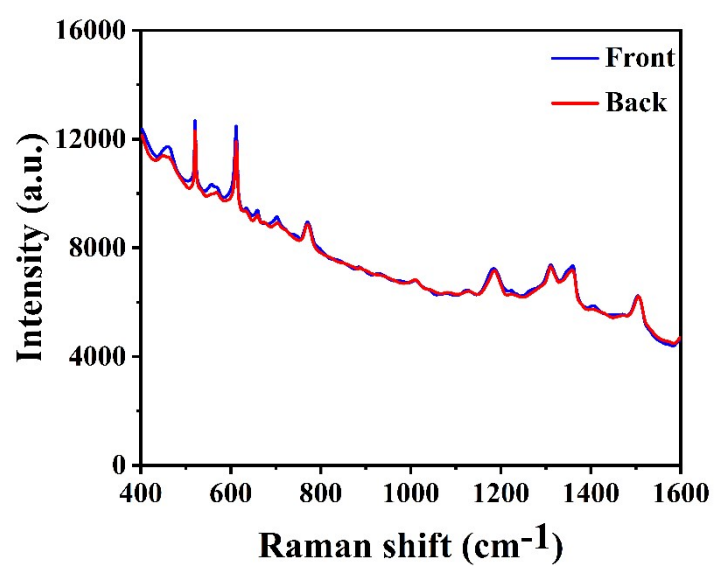

**Fig. S7** SERS spectra of R6G ( $10^{-5}$  M) obtained from both sides of the wrinkled Ag NPs@PDMS thin film.
